# Supplementary material
Source: MDPI journal article supplement (https://www.mdpi.com/2073-4433/13/9/1397)
Supplement: s1 [file s1]

**\*\*\*Supporting Information Available\*\*\***

**The Reaction of HO<sub>2</sub> and CH<sub>3</sub>O<sub>2</sub>: CH<sub>3</sub>OOH Formed from The Singlet Electronic State Surface**

Thanh Lam Nguyen and John F. Stanton\*

*Quantum Theory Project, Departments of Chemistry and Physics, University of Florida, Gainesville, FL 32611 (USA).*

Corresponding authors: [johnstanton@ufl.edu](mailto:johnstanton@ufl.edu); [tlam.nguyen@chem.ufl.edu](mailto:tlam.nguyen@chem.ufl.edu)

To be submitted to *Atmosphere*, 2022.

**Table of contents:**

|              |                                                                                                                                                        |
|--------------|--------------------------------------------------------------------------------------------------------------------------------------------------------|
| Page 2 - 8   | : Optimized geometries of intermediates, products and TSs                                                                                              |
| Page 9 - 13  | : Rovibrational data for various species                                                                                                               |
| Page 14 - 15 | : Table S1: energies and rovibrational data for grid points along the barrier-less association of HO <sub>2</sub> and CH <sub>3</sub> O <sub>2</sub> . |
| Page 16      | : Table S2                                                                                                                                             |

Figures 1-6 can be found in the main text.



## Geometries of various species optimized at fc-CCSD(T)/aVTZ level of theory

### CH<sub>3</sub>OOH(C<sub>1</sub>, <sup>1</sup>A)

CH<sub>3</sub>OOH

C

H 1 B1\*

H 1 B2\* 2 A1\*

H 1 B3\* 2 A2\* 3 D1\*

O 1 B4\* 2 A3\* 4 D2\*

O 5 B5\* 1 A4\* 2 D3\*

H 6 B6\* 5 A5\* 1 D4\*

B1 = 1.091645197619005  
B2 = 1.093522963757435  
A1 = 110.132565261864912  
B3 = 1.092355356550471  
A2 = 110.013076468606712  
D1 = -121.508894255252287  
B4 = 1.420215165057833  
A3 = 104.643188247094528  
D2 = -118.924646619023164  
B5 = 1.460965686633438  
A4 = 105.263175973693833  
D3 = 177.113911395724614  
B6 = 0.967173702517603  
A5 = 99.773803333695767  
D4 = 116.580447413081416

### CH<sub>3</sub>OO(C<sub>s</sub>, <sup>2</sup>A')

CH<sub>3</sub>OO

O

O 1 R1\*

C 2 R2\* 1 A1\*

H 3 R3\* 2 A2\* 1 T180

H 3 R4\* 2 A3\* 4 T2\*

H 3 R4\* 2 A3\* 4 T3\*

R1 = 1.325044184105788  
R2 = 1.447180813090181  
A1 = 109.899561667711836



R3 = 1.088914231377361  
 A2 = 105.474592243366061  
 T180 = 180.000000000000000  
 R4 = 1.089117305766924  
 A3 = 108.868966685897945  
 T2 = 119.459327100774644  
 T3 = -119.459327100774644

### **OH(C<sub>∞v</sub>, X<sup>2</sup>Π)**

OH: Optimized at CCSD(T)/AUG-PVTZ level

O

H 1 B1\*

B1 = 0.973275224901106

### **CH<sub>2</sub>O (C<sub>2v</sub>, X<sup>1</sup>A<sub>1</sub>)**

CH2O

O

C 1 R1\*

H 2 R2\* 1 A1\*

H 2 R2\* 1 A1\* 3 T180

R1 = 1.211515087382290

R2 = 1.103061904375071

A1 = 121.714028216910862

T180 = 180.000000000000000

### **H<sub>2</sub>O (C<sub>2v</sub>, X<sup>1</sup>A<sub>1</sub>)**

H2O

O

H 1 R1\*

H 1 R1\* 2 A1\*

R1 = 0.961579640410436

A1 = 104.179636130297880

### **HO<sub>2</sub>(C<sub>s</sub>, <sup>2</sup>A')**

HOO

O



O 1 R1\*  
H 2 R2\* 1 A1\*

R1 = 1.406201589137402  
R2 = 0.971820663705163  
A1 = 101.623458848955806

**<sup>3</sup>PRC(C<sub>1</sub>, <sup>3</sup>A) optimized at fc-CCSD(T)/ANO1**

PRC-1  
C

H 1 B1\*  
H 1 B2\* 2 A1\*  
H 1 B3\* 2 A2\* 3 D1\*  
O 1 B4\* 2 A3\* 3 D2\*  
O 5 B5\* 1 A4\* 2 D3\*  
O 1 B6\* 5 A5\* 6 D4\*  
O 7 B7\* 1 A6\* 5 D5\*  
H 8 B8\* 7 A7\* 1 D6\*

B1 = 1.087409475690156  
B2 = 1.089317097686931  
A1 = 111.010088816288871  
B3 = 1.088091472975338  
A2 = 112.037079102666425  
D1 = -124.649775170867144  
B4 = 1.451179050948574  
A3 = 104.983065784330321  
D2 = 117.113040802826461  
B5 = 1.318632841747991  
A4 = 111.199811754638318  
D3 = 174.158574519360116  
B6 = 3.285942815787829  
A5 = 101.690977689422695  
D4 = 20.851100185185061  
B7 = 1.335145353168462  
A6 = 88.382232950781884  
D5 = -44.401027359959258  
B8 = 0.983333450192222  
A7 = 103.741101511514074  
D6 = 23.386045791970353



**<sup>1</sup>PRC(C<sub>1</sub>, <sup>1</sup>A, singlet biradical) optimized at fc-CCSD(T)/ANO1**

PRC-1

C

H 1 B1\*

H 1 B2\* 2 A1\*

H 1 B3\* 2 A2\* 3 D1\*

O 1 B4\* 2 A3\* 3 D2\*

O 5 B5\* 1 A4\* 2 D3\*

O 1 B6\* 5 A5\* 6 D4\*

O 7 B7\* 1 A6\* 5 D5\*

H 8 B8\* 7 A7\* 1 D6\*

B1 = 1.087403697699892  
B2 = 1.089309113574224  
A1 = 111.007404294845685  
B3 = 1.088182225057387  
A2 = 112.020904042066462  
D1 = -124.679537852513292  
B4 = 1.451255128658495  
A3 = 104.978677863370862  
D2 = 117.089051490072464  
B5 = 1.318626954982450  
A4 = 111.207446136243576  
D3 = 174.248279306103569  
B6 = 3.287382297565077  
A5 = 101.387635480074238  
D4 = 21.878702414580815  
B7 = 1.335036311766489  
A6 = 87.933566163385422  
D5 = -45.691395629242223  
B8 = 0.983529025705268  
A7 = 103.782570629372671  
D6 = 24.117027786972088

**MTO (C<sub>1</sub>, <sup>1</sup>A) optimized at fc-CCSD(T)/aug-cc-pVTZ**

HP1

C

H 1 B1\*

H 1 B2\* 2 A1\*

H 1 B3\* 2 A2\* 3 D1\*

O 1 B4\* 2 A3\* 4 D2\*



O 5 B5\* 1 A4\* 2 D3\*  
 O 6 B6\* 5 A5\* 1 D4\*  
 O 7 B7\* 6 A6\* 5 D5\*  
 H 8 B8\* 7 A7\* 6 D6\*

B1 = 1.090607587203524  
 B2 = 1.091602254282706  
 A1 = 110.420368609254496  
 B3 = 1.091536230217569  
 A2 = 109.936128957077301  
 D1 = -122.735174590435264  
 B4 = 1.429904678276246  
 A3 = 104.332533147170295  
 D2 = -118.494838255635614  
 B5 = 1.434997229901928  
 A4 = 106.922815022061911  
 D3 = -178.699825829594772  
 B6 = 1.418072237437410  
 A5 = 107.805474592579088  
 D4 = -79.461507314803399  
 B7 = 1.437131178073441  
 A6 = 107.604007365687991  
 D5 = -78.667700486351407  
 B8 = 0.970145424302050  
 A7 = 100.849936827783608  
 D6 = -81.333525587515183

**<sup>3</sup>TS1(C<sub>1</sub>, <sup>3</sup>A) optimized at fc-CCSD(T)/ANO1**

TS1  
 C  
 H 1 B1\*  
 H 1 B2\* 2 A1\*  
 H 1 B3\* 2 A2\* 3 D1\*  
 O 1 B4\* 2 A3\* 3 D2\*  
 O 5 B5\* 1 A4\* 2 D3\*  
 O 5 B6\* 1 A5\* 6 D4\*  
 O 7 B7\* 5 A6\* 1 D5\*  
 H 8 B8\* 7 A7\* 5 D6\*

B1 = 1.088155929600664  
 B2 = 1.088495526744445  
 A1 = 110.977389226514347



B3 = 1.089340879785024  
 A2 = 111.296860956388073  
 D1 = -124.174537729320491  
 B4 = 1.441608202884417  
 A3 = 105.227259156907792  
 D2 = 118.250992714733002  
 B5 = 1.351998473346153  
 A4 = 109.321641762040741  
 D3 = -175.510893361921376  
 B6 = 2.566764177982704  
 A5 = 94.948302362251610  
 D4 = 87.866184986169529  
 B7 = 1.289879902556786  
 A6 = 85.938282567330901  
 D5 = -112.435387258705518  
 B8 = 1.095001937053635  
 A7 = 104.767071515819481  
 D6 = 0.337889334635914

**<sup>1</sup>TS2(C<sub>1</sub>, <sup>1</sup>A) optimized at fc-CCSD(T)/ANO1**

TS2

C

H 1 B1\*

H 1 B2\* 2 A1\*

H 1 B3\* 2 A2\* 3 D1\*

O 1 B4\* 2 A3\* 3 D2\*

O 5 B5\* 1 A4\* 2 D3\*

O 5 B6\* 1 A5\* 6 D4\*

O 7 B7\* 5 A6\* 1 D5\*

H 8 B8\* 7 A7\* 5 D6\*

B1 = 1.088277478688452  
 B2 = 1.088857131904618  
 A1 = 110.907562049931201  
 B3 = 1.089457028376928  
 A2 = 111.262610178100260  
 D1 = -124.033166264875035  
 B4 = 1.440069932167259  
 A3 = 105.183771296674252  
 D2 = 118.311133996585738  
 B5 = 1.358730536472470  
 A4 = 109.111985408132554  
 D3 = -176.173792054525791



B6 = 2.554534579795149  
 A5 = 95.278102118802934  
 D4 = 87.359773577892952  
 B7 = 1.283219039144297  
 A6 = 86.008438414806093  
 D5 = -111.511620496287662  
 B8 = 1.134400985758652  
 A7 = 104.590214792357415  
 D6 = 0.499956741524937

**<sup>1</sup>TS3(C<sub>1</sub>, <sup>1</sup>A) optimized at fc-CCSD(T)/ANO1**

TS3

C

H 1 B1\*

H 1 B2\* 2 A1\*

H 1 B3\* 2 A2\* 3 D1\*

O 1 B4\* 2 A3\* 4 D2\*

O 5 B5\* 1 A4\* 2 D3\*

O 6 B6\* 5 A5\* 1 D4\*

O 7 B7\* 6 A6\* 5 D5\*

H 8 B8\* 7 A7\* 6 D6\*

B1 = 1.088764069734659  
 B2 = 1.089014359871539  
 A1 = 111.101882136551794  
 B3 = 1.088706887763198  
 A2 = 111.084317838082924  
 D1 = -123.994157509586103  
 B4 = 1.441996918070986  
 A3 = 105.475703683200592  
 D2 = -117.780534053605606  
 B5 = 1.334320521618078  
 A4 = 109.016016189592449  
 D3 = 179.248961207250744  
 B6 = 1.989033550897340  
 A5 = 103.195871453203864  
 D4 = -84.508520983447156  
 B7 = 1.351491683253663  
 A6 = 102.998511379817316  
 D5 = -15.198903912248158  
 B8 = 0.971566307879777  
 A7 = 103.584681180228117  
 D6 = -84.120271570665579



## Ro-vibrational parameters for relevant species

### CH<sub>3</sub>O<sub>2</sub>

| Mode | Freq (cm <sup>-1</sup> ) |
|------|--------------------------|
| vib  | 152.7416                 |
| vib  | 493.2912                 |
| vib  | 945.4614                 |
| vib  | 1143.7690                |
| vib  | 1157.5899                |
| vib  | 1212.2719                |
| vib  | 1446.9497                |
| vib  | 1480.1333                |
| vib  | 1493.3817                |
| vib  | 3061.2638                |
| vib  | 3162.3229                |
| vib  | 3170.5420                |
|      |                          |
| A    | 1.7170                   |
| B    | 0.3819                   |
| C    | 0.3323                   |

### HO<sub>2</sub>

| Mode | Freq (cm <sup>-1</sup> ) |
|------|--------------------------|
| vib  | 1129.1697                |
| vib  | 1433.9148                |
| vib  | 3673.5880                |
|      |                          |
| A    | 20.5265                  |
| B    | 1.1134                   |
| C    | 1.0561                   |

### CH<sub>3</sub>OOH

Har. vib. frequencies  
Vib (1DHR)

CCSD(T)/aVTZ  
185.2673



|                                          |           |
|------------------------------------------|-----------|
| Vib (1DHR)                               | 252.7168  |
| vib                                      | 444.0688  |
| vib                                      | 848.9585  |
| vib                                      | 1048.3839 |
| vib                                      | 1173.5470 |
| vib                                      | 1206.8179 |
| vib                                      | 1359.9221 |
| vib                                      | 1456.3420 |
| vib                                      | 1479.1789 |
| vib                                      | 1520.2682 |
| vib                                      | 3022.3930 |
| vib                                      | 3099.9745 |
| vib                                      | 3126.9426 |
| vib                                      | 3769.7714 |
| Rotational constants (cm <sup>-1</sup> ) |           |
| A=                                       | 1.41209   |
| B=                                       | 0.35026   |
| C=                                       | 0.30388   |

### **<sup>3</sup>PRC**

Rotationally projected vibrational frequencies

|    |           |
|----|-----------|
| 7  | 47.1765   |
| 8  | 72.8693   |
| 9  | 120.5581  |
| 10 | 145.3821  |
| 11 | 171.6375  |
| 12 | 215.3159  |
| 13 | 497.8588  |
| 14 | 593.5652  |
| 15 | 928.5938  |
| 16 | 1140.7680 |
| 17 | 1155.5154 |
| 18 | 1173.0678 |
| 19 | 1231.6324 |
| 20 | 1453.6992 |
| 21 | 1480.6257 |
| 22 | 1493.3776 |
| 23 | 1542.1952 |
| 24 | 3063.1400 |
| 25 | 3167.0954 |



26 3186.2226

27 3492.7592

Zero-point energy: 37.7021 kcal/mol =157.7459 kJ/mol = 13186.528 cm<sup>-1</sup>

Rotational constants (in cm<sup>-1</sup>):

0.0651856741

0.0798868227

0.2838477039

## **<sup>1</sup>PRC**

Rotationally projected vibrational frequencies

7 49.6007

8 75.1032

9 120.7617

10 148.2999

11 174.1507

12 215.7129

13 498.4773

14 597.0952

15 928.4713

16 1141.2384

17 1155.9339

18 1173.0655

19 1231.6676

20 1453.6935

21 1480.9750

22 1493.8893

23 1543.1351

24 3062.8403

25 3166.9262

26 3185.8583

27 3488.4377

Zero-point energy: 37.7197 kcal/mol =157.8194 kJ/mol =13192.667 cm<sup>-1</sup>

Rotational constants (in cm<sup>-1</sup>):

0.0653887793

0.0800311876

0.2836753766

## **MTO**

| Mode | Freq (cm <sup>-1</sup> ) |
|------|--------------------------|
| vib  | 95.0016                  |
| vib  | 161.0187                 |



|     |           |
|-----|-----------|
| vib | 225.2493  |
| vib | 336.9378  |
| vib | 360.0658  |
| vib | 545.0755  |
| vib | 608.6688  |
| vib | 668.2944  |
| vib | 834.8866  |
| vib | 874.9196  |
| vib | 1024.3212 |
| vib | 1178.2199 |
| vib | 1211.3085 |
| vib | 1398.6045 |
| vib | 1447.4456 |
| vib | 1475.8510 |
| vib | 1513.0850 |
| vib | 3041.1332 |
| vib | 3129.5138 |
| vib | 3146.8148 |
| vib | 3755.5507 |
|     |           |
| A   | 0.4373    |
| B   | 0.1016    |
| C   | 0.1012    |

### <sup>3</sup>TS1

| Mode | Freq (cm <sup>-1</sup> ) |
|------|--------------------------|
| IMAG | 2012.0064i               |
| vib  | 108.2367                 |
| vib  | 127.1656                 |
| vib  | 162.4400                 |
| vib  | 234.8465                 |
| vib  | 384.8024                 |
| vib  | 488.1187                 |
| vib  | 681.1721                 |
| vib  | 893.1292                 |
| vib  | 946.0875                 |
| vib  | 1149.0615                |



|     |           |
|-----|-----------|
| vib | 1161.8779 |
| vib | 1223.4827 |
| vib | 1340.5436 |
| vib | 1444.9951 |
| vib | 1475.5016 |
| vib | 1488.6168 |
| vib | 1688.4098 |
| vib | 3059.7930 |
| vib | 3159.3982 |
| vib | 3174.7770 |
|     |           |
| A   | 0.2828    |
| B   | 0.1136    |
| C   | 0.0910    |

### <sup>1</sup>TS2

| Mode | Freq (cm <sup>-1</sup> ) |
|------|--------------------------|
| IMAG | 2517.9676i               |
| vib  | <b>108.7539</b>          |
| vib  | 128.0817                 |
| vib  | <b>163.6525</b>          |
| vib  | 235.7261                 |
| vib  | 397.1658                 |
| vib  | 486.4892                 |
| vib  | 659.191                  |
| vib  | 814.8129                 |
| vib  | 944.6861                 |
| vib  | 1137.8728                |
| vib  | 1151.2936                |
| vib  | 1216.3409                |
| vib  | 1330.3391                |
| vib  | 1445.0134                |
| vib  | 1475.1687                |
| vib  | 1488.6503                |
| vib  | 1698.0805                |
| vib  | 3057.8869                |
| vib  | 3156.3125                |



|     |           |
|-----|-----------|
| vib | 3172.6067 |
|     |           |
| A   | 0.2840    |
| B   | 0.1146    |
| C   | 0.0918    |

### **<sup>1</sup>TS3**

| Mode | Freq (cm-1) |
|------|-------------|
| IMAG | 349.9483i   |
| vib  | 85.1349     |
| vib  | 139.1961    |
| vib  | 152.0534    |
| vib  | 242.4814    |
| vib  | 396.2108    |
| vib  | 480.1607    |
| vib  | 522.7513    |
| vib  | 947.5206    |
| vib  | 1041.1945   |
| vib  | 1102.6471   |
| vib  | 1160.7850   |
| vib  | 1209.7835   |
| vib  | 1430.1950   |
| vib  | 1446.7382   |
| vib  | 1476.9181   |
| vib  | 1497.0086   |
| vib  | 3059.4424   |
| vib  | 3160.2798   |
| vib  | 3168.5828   |
| vib  | 3692.2881   |
|      |             |
| A    | 0.2908      |
| B    | 0.1174      |
| C    | 0.0992      |



**Table S1:** Relative energies ( $\Delta E$ , kcal mol<sup>-1</sup>) and rovibrational parameters of grid points along the (variational) reaction coordinate: HO<sub>2</sub> + CH<sub>3</sub>O<sub>2</sub> → <sup>3</sup>PRC\*

| Mode             | Rc = 3.2 Å | 3.4       | 3.6       | 3.8       | 4.2       | 4.5       |
|------------------|------------|-----------|-----------|-----------|-----------|-----------|
| vib              | 56.5299    | 48.9522   | 41.4967   | 36.4220   | 34.8631   | 30.3636   |
| vib              | 66.2550    | 49.8365   | 50.1068   | 53.6113   | 56.8935   | 55.8376   |
| vib              | 113.1962   | 95.4075   | 87.8184   | 80.9682   | 75.4657   | 68.7806   |
| vib              | 147.5963   | 122.8202  | 113.6615  | 106.9620  | 101.8528  | 95.0797   |
| vib              | 177.1380   | 177.1817  | 177.4114  | 177.9895  | 179.9092  | 170.4022  |
| vib              | 457.8475   | 354.3293  | 305.1274  | 258.4917  | 219.5920  | 185.4030  |
| vib              | 503.2437   | 494.3317  | 492.8265  | 491.6869  | 490.6259  | 489.1918  |
| vib              | 903.5880   | 906.6240  | 907.4864  | 907.9003  | 908.1791  | 908.6522  |
| vib              | 1098.2968  | 1093.0095 | 1091.0966 | 1089.8086 | 1089.0420 | 1088.4107 |
| vib              | 1118.2657  | 1116.4384 | 1116.5131 | 1117.0735 | 1117.0388 | 1116.2049 |
| vib              | 1127.7221  | 1123.7449 | 1122.6593 | 1122.9191 | 1124.2170 | 1125.5159 |
| vib              | 1197.4001  | 1193.5533 | 1192.4065 | 1191.8791 | 1191.5136 | 1190.7021 |
| vib              | 1427.9625  | 1426.6234 | 1426.2917 | 1426.4307 | 1426.7985 | 1427.0193 |
| vib              | 1460.7659  | 1455.0307 | 1449.0069 | 1443.5318 | 1439.4512 | 1435.2245 |
| vib              | 1469.5863  | 1465.7291 | 1464.0965 | 1462.7928 | 1461.8042 | 1461.0912 |
| vib              | 1494.5311  | 1476.8149 | 1474.8832 | 1473.9507 | 1473.5182 | 1473.3698 |
| vib              | 3049.1565  | 3048.1824 | 3048.0403 | 3048.2529 | 3048.7929 | 3049.6945 |
| vib              | 3157.9937  | 3156.5918 | 3156.5270 | 3156.8680 | 3157.4900 | 3158.5924 |
| vib              | 3175.1887  | 3171.2522 | 3170.1026 | 3169.8812 | 3170.1345 | 3170.2548 |
| vib              | 3491.9345  | 3536.9127 | 3555.3262 | 3572.3655 | 3585.7838 | 3598.3108 |
|                  |            |           |           |           |           |           |
| A (cm-1)         | 0.2769     | 0.2768    | 0.2767    | 0.2759    | 0.2759    | 0.2797    |
| B                | 0.0695     | 0.0609    | 0.0573    | 0.0541    | 0.0513    | 0.0477    |
| C                | 0.0580     | 0.0517    | 0.0490    | 0.0466    | 0.0445    | 0.0418    |
|                  |            |           |           |           |           |           |
| Del_E (kcal/mol) | 0.0000     | 1.6298    | 2.3031    | 2.8556    | 3.2921    | 3.7314    |



**Table S1 (Continued):**

| Mode                | RC = 4.7 A | 5         | 5.2       | 5.5       | 5.7       | 6         |
|---------------------|------------|-----------|-----------|-----------|-----------|-----------|
| vib                 | 27.3962    | 23.4061   | 21.7600   | 23.6335   | 27.3140   | 24.1580   |
| vib                 | 55.3872    | 51.5755   | 48.2905   | 40.9188   | 39.2262   | 40.8896   |
| vib                 | 65.5395    | 59.9527   | 56.6255   | 50.7505   | 46.2628   | 47.8219   |
| vib                 | 91.0613    | 85.1414   | 80.3932   | 75.5683   | 69.0838   | 66.5606   |
| vib                 | 149.0347   | 120.2320  | 104.4872  | 83.8424   | 73.6637   | 67.0620   |
| vib                 | 181.9023   | 177.0048  | 173.3959  | 167.5137  | 162.7938  | 155.4677  |
| vib                 | 488.4832   | 487.7377  | 487.3371  | 487.0158  | 486.8912  | 487.8454  |
| vib                 | 908.9323   | 909.3642  | 909.5118  | 910.0198  | 910.4468  | 911.1871  |
| vib                 | 1088.2782  | 1088.4345 | 1088.4313 | 1088.9198 | 1089.2533 | 1089.5744 |
| vib                 | 1115.5683  | 1114.5915 | 1113.9909 | 1113.1879 | 1112.8869 | 1112.8916 |
| vib                 | 1126.0652  | 1126.4702 | 1126.2073 | 1125.7983 | 1124.6899 | 1122.1463 |
| vib                 | 1190.1756  | 1189.3801 | 1188.8424 | 1188.1692 | 1187.6073 | 1187.1135 |
| vib                 | 1426.9255  | 1426.5238 | 1425.9036 | 1424.7288 | 1423.7539 | 1422.8105 |
| vib                 | 1433.2295  | 1431.2032 | 1430.4779 | 1429.8584 | 1429.6642 | 1429.2985 |
| vib                 | 1460.7017  | 1459.9990 | 1459.3121 | 1458.1088 | 1457.1636 | 1456.2306 |
| vib                 | 1473.2105  | 1472.6200 | 1471.9590 | 1470.4489 | 1469.2028 | 1467.8143 |
| vib                 | 3050.1959  | 3050.8222 | 3051.1372 | 3052.0853 | 3052.9042 | 3054.4020 |
| vib                 | 3159.2560  | 3160.1192 | 3160.3378 | 3160.5610 | 3160.5464 | 3160.2588 |
| vib                 | 3170.2129  | 3170.1360 | 3170.2562 | 3171.8290 | 3173.5117 | 3177.5054 |
| vib                 | 3603.5177  | 3608.7406 | 3610.6340 | 3613.3677 | 3614.3825 | 3614.7487 |
|                     |            |           |           |           |           |           |
| A (cm-1)            | 0.2847     | 0.2958    | 0.3079    | 0.3361    | 0.3654    | 0.4574    |
| B                   | 0.0455     | 0.0426    | 0.0407    | 0.0383    | 0.0367    | 0.0345    |
| C                   | 0.0402     | 0.0382    | 0.0369    | 0.0352    | 0.0342    | 0.0327    |
|                     |            |           |           |           |           |           |
| Del_E<br>(kcal/mol) | 3.9296     | 4.1272    | 4.2149    | 4.3198    | 4.3720    | 4.4181    |



**Table S2:** Collisional parameters and energies are used in the E,J-resolved 2DME model.

| Parameters                     | Values                                                                                                                                                                                      |
|--------------------------------|---------------------------------------------------------------------------------------------------------------------------------------------------------------------------------------------|
| He                             | Mass = 4.0 g/mol, $\sigma = 2.55 \text{ \AA}$ , $\epsilon/k_B = 10.0 \text{ K}$                                                                                                             |
| CH <sub>4</sub> O <sub>4</sub> | Mass = 80.0 g/mol, $\sigma = 6.0 \text{ \AA}$ , $\epsilon/k_B = 350 \text{ K}$                                                                                                              |
| E <sub>max</sub>               | 30,000 cm <sup>-1</sup> above CH <sub>4</sub> O <sub>4</sub> when $T \leq 500 \text{ K}$ ;                                                                                                  |
| $\Delta E_{\text{grain}}$      | 10 cm <sup>-1</sup> when $T \leq 500 \text{ K}$                                                                                                                                             |
| $\langle \Delta E_d \rangle$   | $265 \cdot \left(\frac{T}{298}\right)^1$ (in cm <sup>-1</sup> ), for the fixed-J ME model<br>$250 \cdot \left(\frac{T}{298}\right)^1$ (in cm <sup>-1</sup> ), for the E,J-resolved ME model |
| J <sub>max</sub>               | 200 with $T \leq 500 \text{ K}$                                                                                                                                                             |
| $\Delta J$                     | 5                                                                                                                                                                                           |
